# Supplementary material for: IscR of Rhodobacter sphaeroides functions as repressor of genes for iron-sulfur metabolism and represents a new type of iron-sulfur-binding protein
Source: PubMed Central journal article supplement (PMC4618611; doi:10.1002/mbo3.279), 2015-08-01
Supplement: mbo30004-0790-sd8.pdf [file mbo30004-0790-sd8.pdf]

**Table S1.** *R. sphaeroides* and *E. coli* strains used in this study

| Strains                                                          | Relevant features                                                                                                  | References                    |
|------------------------------------------------------------------|--------------------------------------------------------------------------------------------------------------------|-------------------------------|
| <i>R. sphaeroides</i>                                            |                                                                                                                    |                               |
| 2.4.1                                                            | <i>Rhodobacter sphaeroides</i> wild type                                                                           | (van Niel, 1944)              |
| 2.4.1 $\Delta$ <i>iscR</i>                                       | Sp <sup>r</sup> , <i>iscR</i> deletion strain                                                                      | This study                    |
| 2.4.1 $\Delta$ <i>iscR</i> _pBBR <i>iscR</i>                     | 2.4.1 $\Delta$ <i>iscR</i> harbouring pBBR <i>iscR</i>                                                             | This study                    |
| 2.4.1-pBE::P <sub><i>iscR</i></sub> ::eCFP                       | Km <sup>r</sup> , 2.4.1 containing pBE::P <sub><i>iscR</i></sub> ::eCFP, used for <i>in vivo</i> reporter system   | This study                    |
| 2.4.1 $\Delta$ <i>iscR</i> -pBE::P <sub><i>iscR</i></sub> ::eCFP | 2.4.1 $\Delta$ <i>iscR</i> containing pBBR <i>iscR</i> , Km <sup>r</sup> , used for <i>in vivo</i> reporter system | This study                    |
| <i>E. coli</i>                                                   |                                                                                                                    |                               |
| JM109                                                            | Host strain for cloning procedures                                                                                 | (Yanisch-Perron et al., 1985) |
| S17-1                                                            | Strain for diparental conjugation, tra <sup>+</sup>                                                                | (Simon et al., 1986)          |
| M15                                                              | Strain for recombinant protein expression                                                                          | Qiagen                        |
| M15-pQE30:: <i>iscR</i>                                          | M15 containing pQE30:: <i>iscR</i> , Ap <sup>r</sup> , used for IscR overexpression                                | This study                    |
| M15-pQE30:: <i>iscR</i> _H93A                                    | M15 containing pQE30:: <i>iscR</i> _H93A, Ap <sup>r</sup> , used for IscR overexpression                           | This study                    |
| M15-pQE30:: <i>iscR</i> _H121A                                   | M15 containing pQE30:: <i>iscR</i> _H121A, Ap <sup>r</sup> , used for IscR overexpression                          | This study                    |
| M15-pQE30:: <i>iscR</i> _H127A                                   | M15 containing pQE30:: <i>iscR</i> _H127A, Ap <sup>r</sup> , used for IscR overexpression                          | This study                    |
| M15-pQE30:: <i>iscR</i> _C142A                                   | M15 containing pQE30:: <i>iscR</i> _C142A, Ap <sup>r</sup> , used for IscR overexpression                          | This study                    |
| M15-pQE30:: <i>iscR</i> _P143A                                   | M15 containing pQE30:: <i>iscR</i> _P143A, Ap <sup>r</sup> , used for IscR overexpression                          | This study                    |
| M15-pQE30:: <i>iscR</i> _H93A/H121A/H127A                        | M15 containing pQE30:: <i>iscR</i> _H93A/H121A/H127A, Ap <sup>r</sup> , used for IscR overexpression               | This study                    |

Sp<sup>r</sup>, spectinomycin-resistant; Ap<sup>r</sup>, ampicillin-resistant; Km<sup>r</sup>, kanamycin resistant; when required, antibiotics were used in the following concentrations: spectinomycin (10  $\mu$ g·ml<sup>-1</sup>) and kanamycin (25  $\mu$ g·ml<sup>-1</sup>) for *R. sphaeroides*; ampicillin (200  $\mu$ g·ml<sup>-1</sup>) for *E. coli*

**Table S2.** Plasmids used in this study

| Plasmid names                                  | Relevant features                                                                                        | Source                 |
|------------------------------------------------|----------------------------------------------------------------------------------------------------------|------------------------|
| pBBR1-MCS-2                                    | Km <sup>r</sup> , broad-host-range cloning vector                                                        | (Kovach et al., 1995)  |
| pBBR <i>iscR</i>                               | Km <sup>r</sup> , pBBR1-MCS-2 containing <i>iscR</i> gene                                                | This study             |
| pET28(a)                                       | Km <sup>r</sup> , high expression vector                                                                 | Novagen                |
| pBE                                            | Km <sup>r</sup> , Derivate of pBBR1-MCS-2                                                                | This study             |
| pBE4352                                        | Km <sup>r</sup> , pBE containing RSP_4352 promoter                                                       | This study             |
| pBE4352::eCFP:eCFP                             | Km <sup>r</sup> , pBE4352 containing two eCFP                                                            | This study             |
| pBE::P <sub><i>iscR</i></sub> ::eCFP           | Km <sup>r</sup> , pBBR containing <i>iscR</i> fragment for <i>cfp</i> fusion                             | This study             |
| pHP45 $\Omega$                                 | Sp <sup>r</sup> , source of $\Omega$ -Sp <sup>r</sup> cassette                                           | (Prentki et al., 1991) |
| pPHU281                                        | Tc <sup>r</sup> , <i>lacZ'</i> <i>mob</i> (RP4)                                                          | (Hubner et al., 1991)  |
| pPHU $\Delta$ 2.4. <i>iscR</i>                 | Tc <sup>r</sup> , pPHU281 containing <i>iscR</i> gene with flanking sites                                | This study             |
| pPHU $\Delta$ 2.4.1 <i>iscR</i> :: $\Omega$ Sp | Tc <sup>r</sup> , Sp <sup>r</sup> , pPHU281 $\Delta$ 2.4.1 <i>iscR</i> containing spectinomycin cassette | This study             |
| pJET1.2                                        | Ap <sup>r</sup> , 2.97 kb, PCR cloning vector                                                            | Fermentas              |
| pQE30                                          | Ap <sup>r</sup> , 3.4 kb, 6xHis-tag overexpression vector                                                | Qiagen                 |
| pQE30:: <i>iscR</i>                            | Ap <sup>r</sup> , pQE30 containing <i>iscR</i> fragment for overexpression                               | This study             |
| pQE30:: <i>iscR</i> _H93A                      | Ap <sup>r</sup> , pQE30 containing a mutation of amino acid 93                                           | This study             |
| pQE30:: <i>iscR</i> _H121A                     | Ap <sup>r</sup> , pQE30 containing a mutation of amino acid 121                                          | This study             |
| pQE30:: <i>iscR</i> _H127A                     | Ap <sup>r</sup> , pQE30 containing a mutation of amino acid 127                                          | This study             |
| pQE30:: <i>iscR</i> _H93A/H121A/H127A          | Ap <sup>r</sup> , pQE30 containing mutations of amino acids 93, 121 and 127                              | This study             |
| pQE30:: <i>iscR</i> _C142A                     | Ap <sup>r</sup> , pQE30 containing a mutation of amino acid 142                                          | This study             |
| pQE30:: <i>iscR</i> _P143A                     | Ap <sup>r</sup> , pQE30 containing a mutation of amino acid 143                                          | This study             |

Sp<sup>r</sup>, spectinomycin-resistant; Ap<sup>r</sup>, ampicillin-resistant; Tc<sup>r</sup>, tetracycline-resistant; Km<sup>r</sup>, kanamycin resistant

**Table S3.** Oligonucleotides used in this study

| Name                 | Sequence                     | Purpose                                                          |
|----------------------|------------------------------|------------------------------------------------------------------|
| RT_RSP_0040_A        | TCGAACGACACCAACACC           | Forward primer for RSP_0040 ( <i>fliS</i> ) real-time RT-PCR     |
| RT_RSP_0040_B        | CACCTTCATGCCGTTGAA           | Reverse primer for RSP_0040 ( <i>fliS</i> ) real-time RT-PCR     |
| RT_RSP_0257_A        | ACACCTACGGCAACTTCC           | Forward primer for RSP_0257 ( <i>pufL</i> ) real-time RT-pCR     |
| RT_RSP_0257_B        | ATCGAGTAGCCGACCAGA           | Reverse primer for RSP_0257 ( <i>pufL</i> ) ) real-time RT-PCR   |
| RT_RSP_0288_A        | CGATCAGGCGGTGGTGGT           | Forward primer for RSP_0288 ( <i>bchL</i> ) real-time RT-PCR     |
| RT_RSP_0288_B        | CGTCGAGGTCCGGCATGT           | Reverse primer for RSP_0288 ( <i>bchL</i> ) real-time RT-PCR     |
| RT_RSP_0443_A        | GGTGGAAGAGACGCTCAA           | Forward primer for RSP_0443 ( <i>iscR</i> ) real-time RT-PCR     |
| RT_RSP_0443_B        | ATAGACATGCGCCGAGAC           | Reverse primer for RSP_0443 ( <i>iscR</i> ) real-time RT-PCR     |
| RT_RSP_0920_A        | GGCAGCTTCGAGGAAGTG           | Forward primer for RSP_0920 ( <i>exbB</i> ) real-time RT-PCR     |
| RT_RSP_0920_B        | GTCTGGCTCTGCGAGATG           | Reverse primer for RSP_0920 ( <i>exbB</i> ) real-time RT-PCR     |
| RT_RSP_1545_A        | CTTCGAGCGGAGAT               | Forward primer for RSP_1545 real-time RT-PCR                     |
| RT_RSP_1545_B        | GCCGCAGGAACATCG              | Reverse primer for RSP_1545 real-time RT-PCR                     |
| RT_RSP_1547_A        | GTCTGCCACTGCATGGGCAT         | Forward primer for RSP_1547 ( <i>bfd</i> ) real-time RT-PCR      |
| RT_RSP_1547_B        | GTTTCATTCCTGCGGTTGTGG        | Reverse primer for RSP_1547 ( <i>bfd</i> ) real-time RT-PCR      |
| RT_RSP_1669_A        | ATCGCGGAAGAGACCCAGAG         | Forward primer for RSP_1669 ( <i>rpoZ</i> ) real-time RT-PCR     |
| RT_RSP_1669_B        | GAGCAGCCCATCTGATCCT          | Reverse primer for RSP_1669 ( <i>rpoZ</i> ) real-time RT-PCR     |
| RT_RSP_2913_A        | CATCAGCCTCGGCAACAC           | Forward primer for RSP_2913 ( <i>afuA</i> ) real-time RT-PCR     |
| RT_RSP_2913_B        | TGGTTCGTCTCGGCGTAG           | Reverse primer for RSP_2913 ( <i>afuA</i> ) real-time RT-PCR     |
| RT_RSP_3416_A        | CGAGATGATCCGGCT              | Forward primer for RSP_3416 real-time RT-PCR                     |
| RT_RSP_3416_B        | GTCGGTCGCGGAATA              | Reverse primer for RSP_3416 real-time RT-PCR                     |
| RT_RSP_3417_A        | AGACACGCAAGAGCG              | Forward primer for RSP_3417 real-time RT-PCR                     |
| RT_RSP_3417_B        | GCCACCGATTCCACA              | Reverse primer for RSP_3417 real-time RT-PCR                     |
| RT_RSP_4275_A        | ACACCTCCTCAGCT               | Forward primer for RSP_4275 ( <i>fecl</i> ) real-time RT-PCR     |
| RT_RSP_4275_B        | AGACGCAGGAAGATG              | Reverse primer for RSP_4275 ( <i>fecl</i> ) real-time RT-PCR     |
| RT_RSP_6006_A        | ATGACCGACCCGATGGAG           | Forward primer for RSP_6006 ( <i>hemP</i> ) real-time RT-PCR     |
| RT_RSP_6006_B        | AGTAGATCTGCCGCTCGAG          | Reverse primer for RSP_6006 ( <i>hemP</i> ) real-time RT-PCR     |
| RT_RSP_6020_A        | CGGCGAGGTCAAGGTGAT           | Forward primer for RSP_6020 ( <i>feoA2</i> ) real-time RT-PCR    |
| RT_RSP_6020_B        | TGCAGCGGAGTGACGAAG           | Reverse primer for RSP_6020 ( <i>feoA2</i> ) real-time RT-PCR    |
| <i>suf1</i> RT_A     | CGAAGCTCACGGCTTCACCT         | Forward primer for RT-PCR                                        |
| <i>suf1</i> RT_B     | AGGCGCCATTGTCTGAGATAG        | Reverse primer for RT-PCR                                        |
| <i>suf2</i> RT_A     | CGACCTCGAGGCGCGGATCAAAGG     | Forward primer for RT-PCR                                        |
| <i>suf2</i> RT_B     | GCGAAGTCCATCTCGATCTCGGTTTC   | Reverse primer for RT-PCR                                        |
| <i>suf3</i> RT_A     | CTCGGAGAGGAAGAGGCCGGCTC      | Forward primer for RT-PCR                                        |
| <i>suf3</i> RT_B     | GTGCCGACCGAGACCGAGTCGAAAG    | Reverse primer for RT-PCR                                        |
| <i>suf4</i> RT_A     | AGACGCAGGTGATGCAGATG         | Forward primer for RT-PCR                                        |
| <i>suf4</i> RT_B     | GAACCGCAGTCTCTTCCAGT         | Reverse primer for RT-PCR                                        |
| <i>suf5</i> RT_A     | TCTCGGCGCATGTCTATGTC         | Forward primer for RT-PCR                                        |
| <i>suf5</i> RT_B     | CGTCGCATTCCAGTCGAGAT         | Reverse primer for RT-PCR                                        |
| 0443_upA             | GAGCCGCCGAATTCGGGGTGC        | Forward primer for RSP_0443 cloning                              |
| 0443_upB             | GAGCGCGGGATCCACCAGCG         | Reverse primer for RSP_0443 cloning                              |
| 0443_downA           | GCGTGCAGGATCCTTGACCAACCG     | Forward primer for RSP_0443 cloning                              |
| 0443_downB           | GAGACAGCCTCAAGCTTCACGTCG     | Reverse primer for RSP_0443 cloning                              |
| <i>IscR</i> _complA  | TAATCTAGAACCATTCCACCTGGGCG   | Forward primer for RSP_0443 complementation                      |
| <i>IscR</i> _complB  | CGCTGGATCCTTCACTCTGGC        | Reverse primer for RSP_0443 complementation                      |
| <i>IscR</i> -His_fwd | GGCGGGAACCGGGATCCAAACTCTC    | Forward primer for <i>IscR</i> overexpression                    |
| <i>IscR</i> -His_rev | CGACAGCCAAGCTTTCAGTCTCTCGTC  | Forward primer for <i>IscR</i> overexpression                    |
| <i>IscR</i> _repA    | TCTAGAAAATCACTTCGGGCATCGC    | Forward primer RSP_0443 for <i>in vivo</i> reporter system       |
| <i>IscR</i> _repB    | GGATCCTTTCGGTTCGCGCAAATC     | Reverse primer RSP_0443 for <i>in vivo</i> reporter system       |
| <i>IscR</i> _H93A_A  | GCGATGGCTACCGGTGCTGGTGCAAGTG | Forward primer inserting a mutation to H93                       |
| <i>IscR</i> _H93A_B  | GAGACGGTCAATGCGATGGCTACCGGTG | Reverse primer inserting a mutation to H93                       |
| <i>IscR</i> _H121A_A | CTCGGCGGCTGTCTATGTCTTCTGAC   | Forward primer inserting a mutation to H121                      |
| <i>IscR</i> _H121A_B | GTGGGAGGGCCTCTCGGCGGCTGTCTAT | Reverse primer inserting a mutation to H121                      |
| <i>IscR</i> _H127A_A | CTTCTGCGCCAGACCCGTCTGTGCGAC  | Forward primer inserting a mutation to H127                      |
| <i>IscR</i> _H127A_B | GCATGTCTATGTCTTCTGCGCCAGACC  | Reverse primer inserting a mutation to H127                      |
| <i>IscR</i> _C142A_A | GCGTCCAGCCCCGGCGGTGCCGGCGCTG | Forward primer inserting a mutation to C142                      |
| <i>IscR</i> _C142A_B | CAAAAACGAGATGCGTCCAGCCCCGGCG | Reverse primer inserting a mutation to C142                      |
| <i>IscR</i> _P143A_A | GCGTCCAGCCCCGGCGGTGCCGGCGCTG | Forward primer inserting a mutation to P143                      |
| <i>IscR</i> _P143A_B | AAACGAGATGCGTCCATGCGCGGCGGTG | Reverse primer inserting a mutation to P143                      |
| <i>iscR</i> _up_fwd  | CGCGGCGTAATCTTGACAAAAACG     | Forward primer for generation of the <i>iscR</i> promoter region |
| <i>iscR</i> _up_rev  | CGACACGTCGACAAGCGAGACAAG     | Reverse primer for generation of the <i>iscR</i> promoter region |
| <i>hemP</i> _up_fwd  | CGCATAAGTCGACCGAAAGAATCAG    | Forward primer for generation of the <i>hemP</i> promoter region |
| <i>hemP</i> _up_rev  | CCGTCGACAAGGATCCGGGCC        | Reverse primer for generation of the <i>hemP</i> promoter region |

## References

- HUBNER, P., WILLISON, J. C., VIGNAIS, P. M. & BICKLE, T. A. 1991. Expression of regulatory nif genes in *Rhodobacter capsulatus*. *J Bacteriol*, 173, 2993-9.
- KOVACH, M. E., ELZER, P. H., HILL, D. S., ROBERTSON, G. T., FARRIS, M. A., ROOP, R. M., 2ND & PETERSON, K. M. 1995. Four new derivatives of the broad-host-range cloning vector pBBR1MCS, carrying different antibiotic-resistance cassettes. *Gene*, 166, 175-6.
- PRENTKI, P., BINDA, A. & EPSTEIN, A. 1991. Plasmid vectors for selecting IS1-promoted deletions in cloned DNA: sequence analysis of the omega interposon. *Gene*, 103, 17-23.
- SIMON, R., O'CONNELL, M., LABES, M. & PUHLER, A. 1986. Plasmid vectors for the genetic analysis and manipulation of rhizobia and other gram-negative bacteria. *Methods Enzymol*, 118, 640-59.
- VAN NIEL, C. B. 1944. The Culture, General Physiology, Morphology, and Classification of the Non-Sulfur Purple and Brown Bacteria. *Bacteriol Rev*, 8, 1-118.
- YANISCH-PERRON, C., VIEIRA, J. & MESSING, J. 1985. Improved M13 phage cloning vectors and host strains: nucleotide sequences of the M13mp18 and pUC19 vectors. *Gene*, 33, 103-19.
